# Supplementary material for: A transcriptional hub integrating gibberellin–brassinosteroid signals to promote seed germination in Arabidopsis
Source: PubMed Central journal article supplement (PMC8219041; doi:10.1093/jxb/erab192), 2021-05-08
Supplement: erab192_suppl_supplementary_materials.pdf [file erab192_suppl_supplementary_materials.pdf]

## Supplementary material:

### **A transcriptional hub integrating gibberellin-brassinosteroid signals to promote seed germination in *Arabidopsis***

Chunmei Zhong<sup>a</sup>, Barunava Patra<sup>c</sup>, Yi Tang<sup>b</sup>, Xukun Li<sup>b</sup>, Ling Yuan<sup>c,\*</sup>, and Xiaojing Wang<sup>b,\*</sup>

<sup>a</sup>College of Forestry and Landscape Architecture, South China Agricultural University, Guangzhou, 510642, China

<sup>b</sup>Guangdong Provincial Key Laboratory of Biotechnology for Plant Development, School of Life Science, South China Normal University, Guangzhou 510631, China

<sup>c</sup> Department of Plant and Soil Sciences, Kentucky Tobacco Research and Development Center, University of Kentucky; Lexington, KY 40546 USA

Authors for Correspondence: Xiaojing Wang and Ling Yuan

Tel: +86 020 85216417; 001 859 257 4806

Email: wangxj@scnu.edu.cn; lyua3@uky.edu

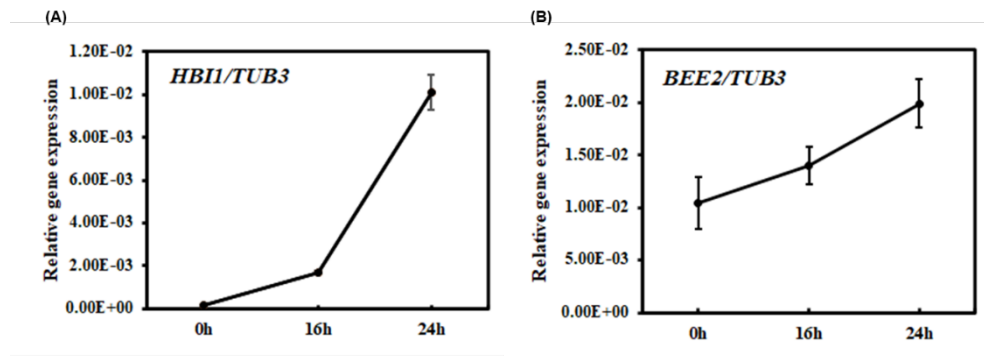

**Fig. S1** Relative gene expression of *HBI1* (A) and *BEE2* (B) during seed germination, 0 h was marked as the timepoint when seeds were exposed to light after 3 days stratification. The transcript levels were normalized to *TUB3*.

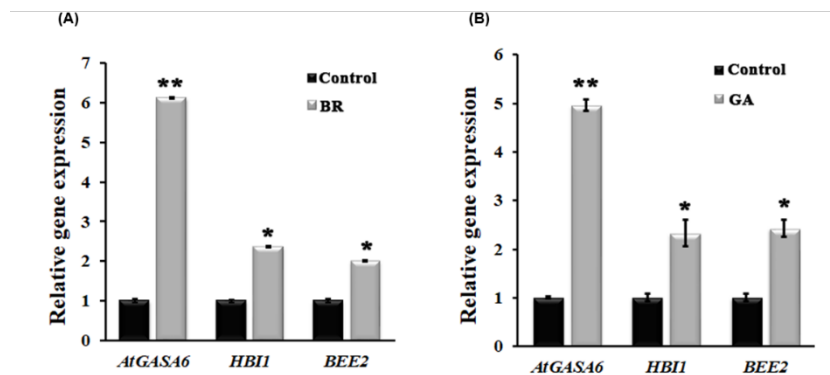

**Fig. S2** Relative gene expression of *HBI1*, *BEE2*, and *GASA6* in response to BR (A) and GA (B). Two-week-old seedlings were treated with 1  $\mu$ M BR or 100  $\mu$ M GA<sub>3</sub> for 2 h. The transcript levels were normalized to *TUB3*. One-way ANOVA was used to analyze the significant difference. \*  $P < 0.05$ ; \*\*  $P < 0.01$ .

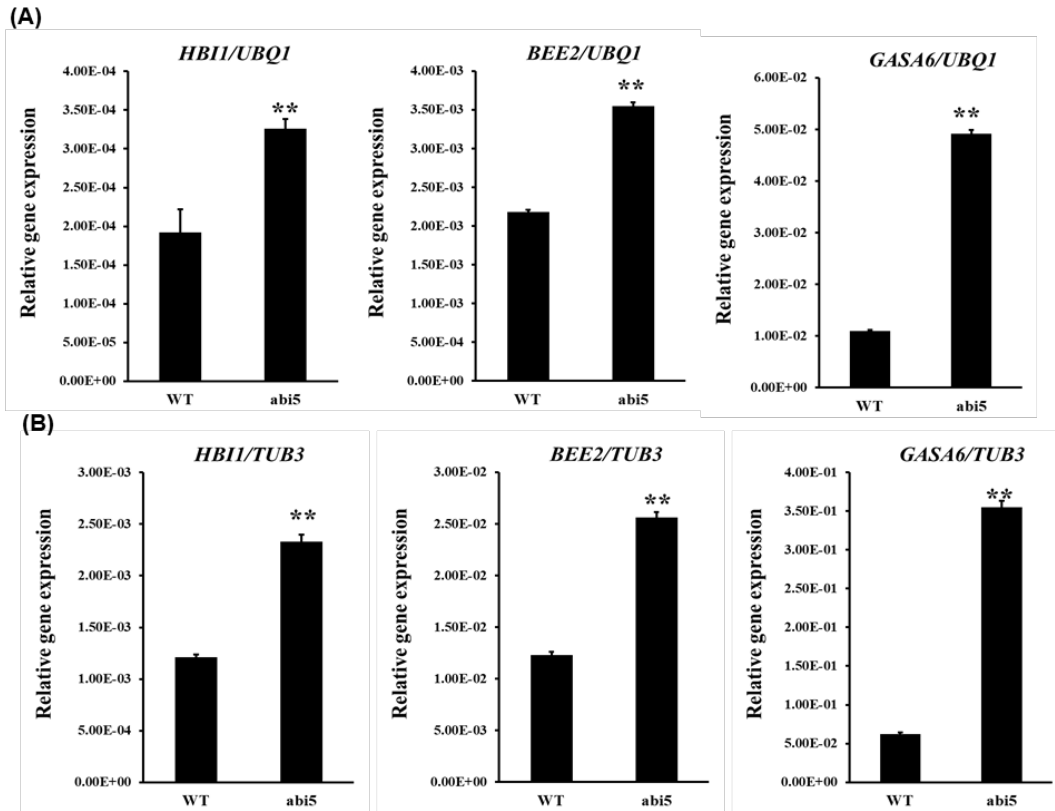

**Fig. S3** Relative expression of *GASA6*, *HBI1* and *BEE2* in *abi5* mutant seeds.

Wild-type Arabidopsis (Ws) was used as the control. The transcript levels were normalized to *UBQ1* (A) or *TUB3* (B) gene expression. One-way ANOVA was used to analyze the significant difference. \*\*  $P < 0.01$ .

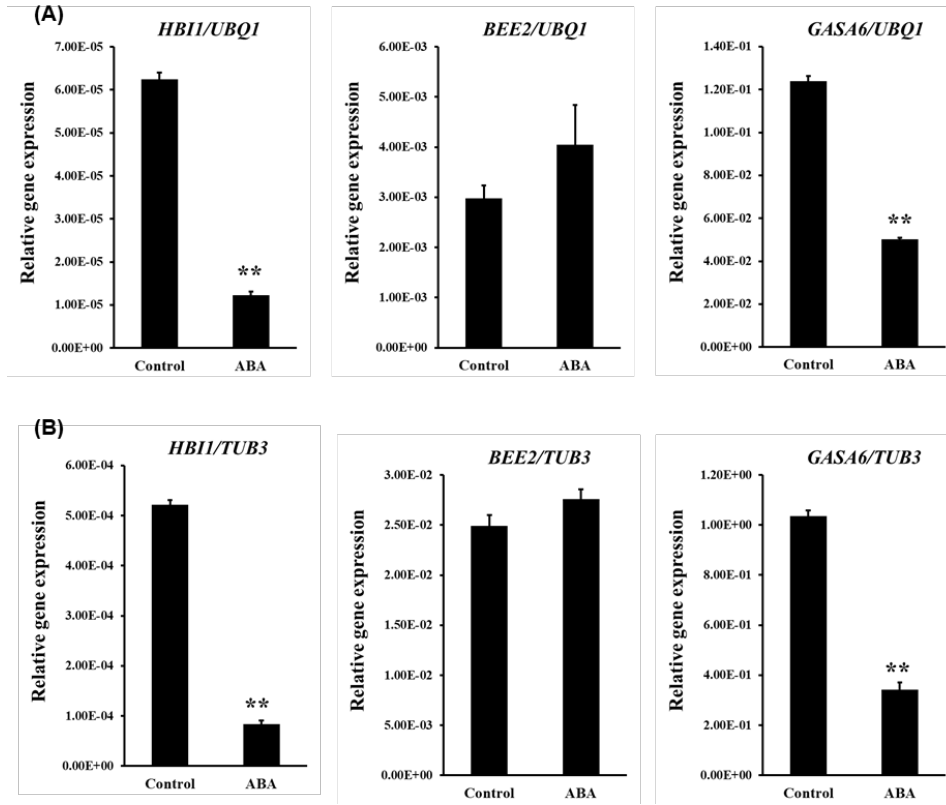

**Fig. S4** Relative gene expression of *HBII*, *BEE2*, and *GASA6* in response to ABA.

Germinating seeds were treated with 100  $\mu$ M ABA for 2 h. The transcript levels were normalized to *UBQ1* (A) or *TUB3* (B) gene expression. One-way ANOVA was used to analyze the significant difference. \*\*  $P < 0.01$ .

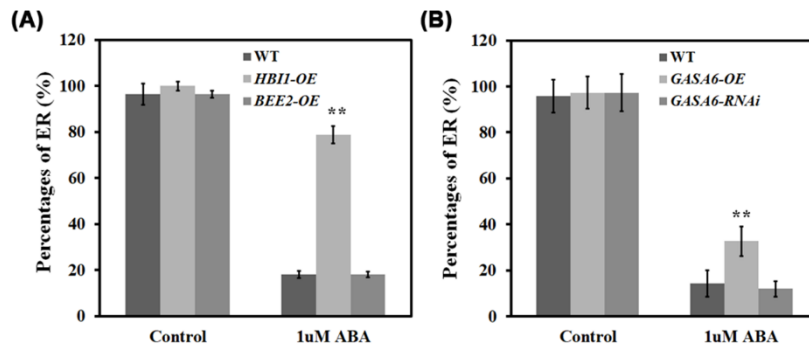

**Fig. S5** Effect of ABA on ER of WT, *HBII-OE* or *BEE2-OE* seeds.

(A) Percentage of ER in WT, *HBII-OE* or *BEE2-OE*, seeds were treated with 1  $\mu$ M ABA for 36 h. (B) Percentage of ER in WT, *GASA6-OE* and *RNAi* seeds treated with 1  $\mu$ M ABA for 36 h. Seeds germinated on  $\frac{1}{2}$  basal MS was used as all of the control. The asterisks indicate significant differences compared with WT. one-way ANOVA was used to analyze the significant difference. \*\*  $P < 0.01$ .

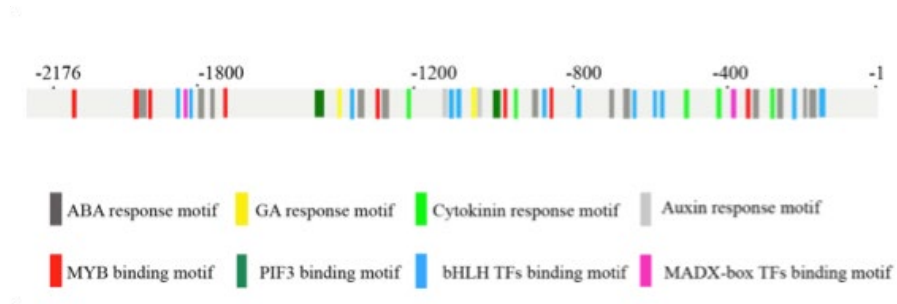

**Fig. S6** *Cis*-motif analysis of *AtGASA6* promoter. Distribution of ABA-, GA-, CK- and Auxin-response elements, and MYB, PIF, bHLH and MADX-box transcription factors binding elements in *AtGASA6* promoter. *Cis*-motifs were identified by using online software PlantPAN (<http://plantpan2.itps.ncku.edu.tw/>), PLACE (<http://www.dna.affrc.go.jp/PLACE/>) and AGRIS (<http://arabidopsis.med.ohio-state.edu/>). Promoter of *AtGASA6* 2176 bp from ATG was used for analysis.

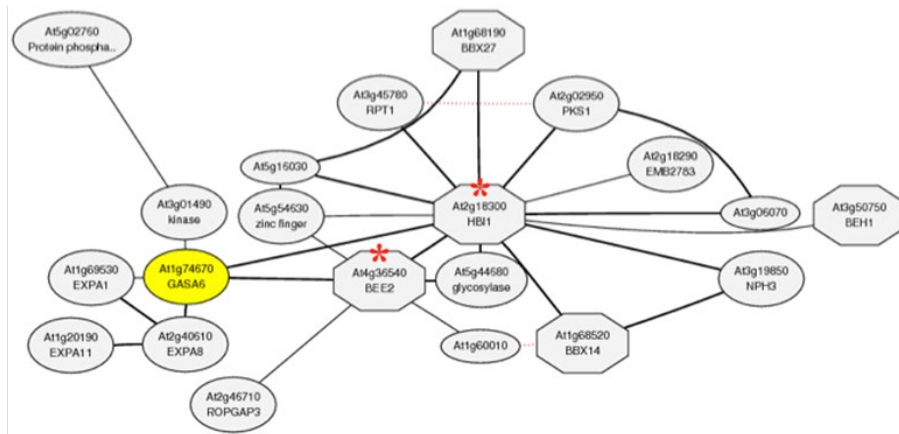

**Fig. S7.** The co-expression network of *AtGASA6* in Arabidopsis analyzed by the ATTED-II network drawer ([http://atted.jp/top\\_draw.shtml#NetworkDrawer](http://atted.jp/top_draw.shtml#NetworkDrawer)). The yellow oval indicated the query gene. The red asterisks indicate the closet genes.

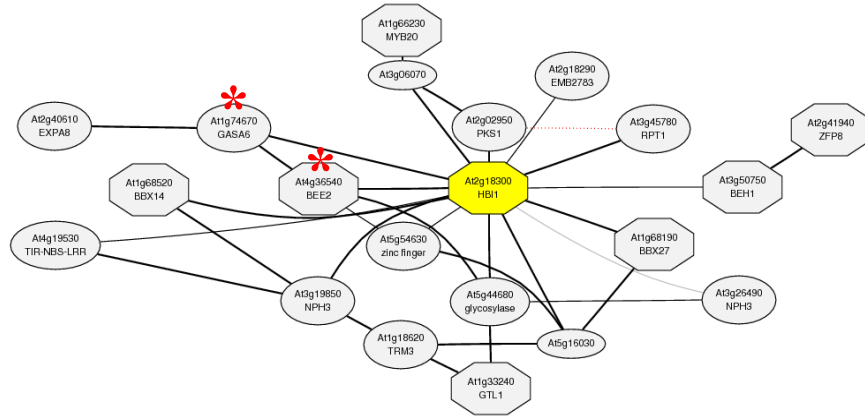

**Fig. S8.** The co-expression network of *HBI1* in Arabidopsis analyzed by the ATTED-II network drawer. The yellow oval indicated the query gene. The red asterisks indicate the closet genes.

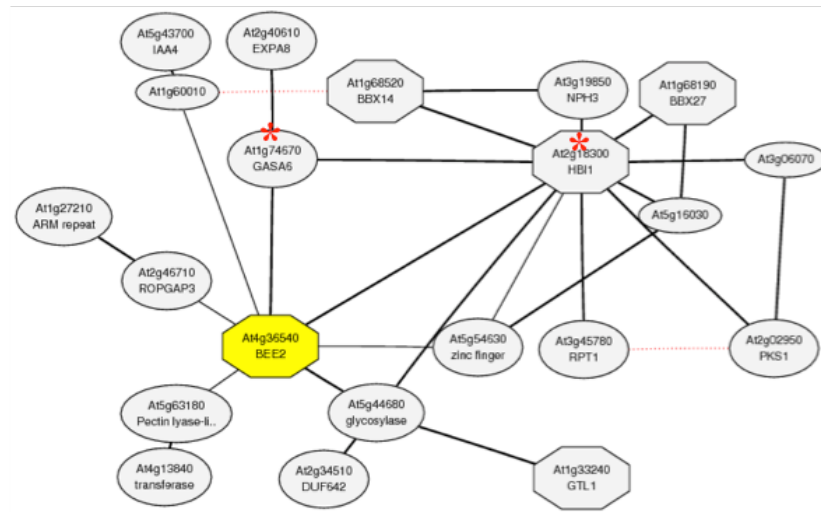

**Fig. S9.** The co-expression network of *BEE2* in Arabidopsis analyzed by the ATTED-II network drawer. The yellow oval indicated the query gene. The red asterisks indicate the closet genes.

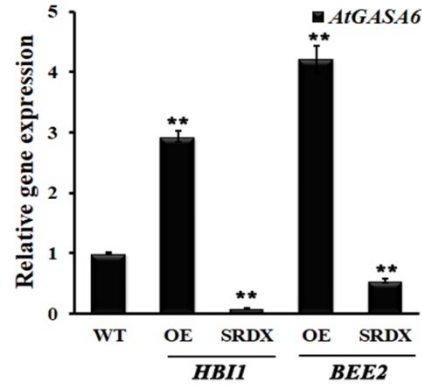

**Fig. S10** Relative gene expression of *GASA6* in *HBI1*- or *BEE2*-OE and SRDX lines. Col0 was used as WT. The transcript levels were normalized to *TUB3*. One-way ANOVA was used to analyze the significant difference. \*\*  $P < 0.01$ .

**Table S1** List of gen-specific primer sequences

| Primer name                | Sequence (5' to 3')         |
|----------------------------|-----------------------------|
| <i>GASA6</i> -FW-QPCR      | CAATGCACAAGGAGATGTAGCAAC    |
| <i>GASA6</i> -RV-QPCR      | AGGGACACAAAGGCATTTAGCA      |
| <i>HBI1</i> -FW-QPCR       | TGTGCCTGGATGCAATAAGG        |
| <i>HBI1</i> -RV-QPCR       | ATACATCTTCCACGGCAAGC        |
| <i>BEE2</i> -FW-QPCR       | ACAGAGCCAAGCATGAAAGG        |
| <i>BEE2</i> -RV-QPCR       | TTGCCCTCTCTGCTAAGCTATG      |
| <i>UBQ1</i> -FW-QPCR       | GGCCAAGATCCAAGACAAAG        |
| <i>UBQ1</i> -RV-QPCR       | GTTGACAGCTCTTGGGTGAA        |
| TUB3-FW-QPCR               | GTGACTGCCTCCAAGGGTTC        |
| TUB3-RV-QPCR               | CGTTGTAAGGCTCCACCACA        |
| <i>PP2A</i> -ChIP-F        | ATGGCTGCGATTCTAGAGATCG      |
| <i>PP2A</i> -ChIP-R        | TAATCTGGAGTCTTGCGAGTGG      |
| <i>GASA6</i> -P1-ChIP-F-2  | GAATGACTTAAACAATCAAGTGGCAG  |
| <i>GASA6</i> -P1-ChIP-R-2  | GTGTGTGTAAGCTTCCTCATTAC     |
| <i>GASA6</i> -P2- ChIP-F-2 | GACACTATTAGTATATTATTGGACCCG |
| <i>GASA6</i> -P2- ChIP-R-2 | CTACAGGCAGAAATTATTTTACATGTG |



|                                  |                                                     |
|----------------------------------|-----------------------------------------------------|
| <i>GASA6</i> -P3- ChIP-F-1       | TGGTCCCAATCACTTGCCT                                 |
| <i>GASA6</i> -P3- ChIP-R-1       | GTCACATTTGGGACTACACCC                               |
| <i>GASA6</i> -P4- ChIP-F-1       | GTGTATCCACAAAATGCAAAGATAGA                          |
| <i>GASA6</i> -P4- ChIP-R-1       | GAGAGACAAAAGGGTAGAGGCA                              |
| <i>GASA6</i> -P5- ChIP-F-1       | GAATTGTGAGTGTTCGTAACAAGAT                           |
| <i>GASA6</i> -P5- ChIP-R-1       | TTGGTCGTCCAATAAAAATAGCATT                           |
| <i>GASA6</i> -P6- ChIP-F-1       | CATCTCCATCAATGGTTTCTCATTG                           |
| <i>GASA6</i> -P6- ChIP-R-1       | ACAAGTGTTCTTATGGGTTTCTCAG                           |
| <i>pGASA6</i> -1.4k-LUC-XhoI-F   | CCGCTCGAGCTTTGAATTGTGAGTGTCTG                       |
| <i>pGASA6</i> -1.4k-LUC-PstI-R   | CAACTGCAGGACTAGCTCTTGAGAGAGAGAG                     |
| <i>pGASA6</i> -1.2k-LUC- XhoI -F | CCGCTCGAGCCACAAAATGCAAAGATAGAA                      |
| <i>pGASA6</i> -1.1k-LUC- XhoI -F | CCGCTCGAGAACTGCCTCTACCCTTTTGTCT                     |
| <i>pGASA6</i> -0.9k-LUC- XhoI -F | CCGCTCGAGTATTTGTTGGTTGGTCCCAATC                     |
| <i>pGASA6</i> -1.4k-mut1-LUC-F   | CACAAAAACTATTTTATTGGACG                             |
| <i>pGASA6</i> -1.4k-mut1-LUC-R   | ATTAAAAATTGTTTGTGTTTAACG                            |
| <i>pGASA6</i> -1.4k-mut2-LUC-F   | CCATAAAAGT GCACATGGAGTT                             |
| <i>pGASA6</i> -1.4k-mut2-LUC-R   | GAGACATATATCTATCTAATGCTTTC                          |
| <i>pGASA6</i> -1.4k-mut3-LUC-F   | CCATGTGAGTGCACAAAGAGTT                              |
| <i>pGASA6</i> -1.4k-mut3-LUC-R   | The same sequence as <i>pGASA6</i> -1.4k-mut2-LUC-R |
| HBI1-FW-PBS-BamHI                | GTACGGATCCATGTTGGAAGGTCTTGTCTCTCA                   |
| HBI1-RV-PBS-PstI                 | ATGCTGCAGTTAGTAATGAAAACCGAGGCTAG                    |
| BEE2-FW-PBS-BamHI                | AGCTGGATCCATGGACTTGTCTGTACTTGATAGGC                 |
| BEE2-RV-PBS-XbaI                 | GTA CTCTAGATTACTTGAGGCTGAAGAAATTGGA                 |
| IBH1-FW-PBS-BamHI                | ATCGGGATCCATGGCCTCTGCAGACAAACT                      |
| IBH1-RV-PBS-XbaI                 | ATCGTCTAGAATCATTGGGAGATAAGCCATCA                    |
| HBI1-pAD/BD-EcoRI-F              | ACCGGAATTCATGTTGGAAGGTCTTGTCTCTCA                   |
| HBI1-pAD-XhoI-R                  | CACGCTCGAGTTAGTAATGAAAACCGAGGCTAG                   |
| HBI1-pBD-PstI-R                  | CCAACTGCAGTTAGTAATGAAAACCGAGGCTAG                   |

|                          |                                           |
|--------------------------|-------------------------------------------|
| BEE2-pAD-BamHI-F         | ACGCGGATCCATATGGACTTGTCTGTACTTGATAGGC     |
| BEE2-pAD-XhoI-R          | CACGCTCGAGTTACTTGAGGCTGAAGAAATTG          |
| BEE2-pBD-NcoI-F          | CACGCCATGGAGATGGACTTGTCTGTACTTGATAGGC     |
| BEE2-pBD-BamHI-R         | ACGCGGATCCTTACTTGAGGCTGAAGAAATTG          |
| IBH1-pAD/pBD-EcoRI-F     | ACCGGAATTCATGGCCTCTGCAGACAAACT            |
| IBH1-pAD/pBD-BamHI-R     | ACGCGGATCCTCATTGGGAGATAAGCCATCA           |
| HBI1-BiFC-EcoRI-F        | ACCGGAATTCTATGTTGGAAGGTCTTGTCTCTCA        |
| HBI1-BiFC-BamHI-R        | CGCGGATCCTTAGTAATGAAAACCGAGGCTAG          |
| BEE2-BiFC-XhoI-F         | CCGCTCGAGCTATGGACTTGTCTGTACTTGATAGGC      |
| BEE2-BiFC-BamHI-R        | The same sequence as BEE2-pBD-BamHI-R     |
| IBH1-BiFC-EcoRI-F        | ACCGGAATTCTATGGCCTCTGCAGACAAACT           |
| IBH1-BiFC-BamHI-R        | The same sequence as IBH1-pAD/pBD-BamHI-R |
| BEE2-pAD-N1-BamHI-F      | ACGGGATCCATATGGACTTGTCTGTACTTGATAGGC      |
| BEE2-pAD-N1-XhoI-R       | TCCGCTCGAGTTCTGGATTTATGACAGAGAGTTTCA      |
| BEE2-pAD-N2-BamHI-F      | The same sequence as BEE2-pAD-N1-BamHI-F  |
| BEE2-pAD-N2-XhoI-R       | TCCGCTCGAGGGCTTCACCTCGTCTAGCC             |
| BEE2-pAD-C1-BamHI-F      | ACGCGGATCCATACCGACAGACATAGCTTAGCAG        |
| BEE2-pAD-C1-XhoI-R       | TCCGCTCGAGTTACTTGAGGCTGAAGAAATTGGA        |
| BEE2-pAD-C2-BamHI-F      | CGCGGATCCATCTTGAGTGTGCATATCGATGATTT       |
| BEE2-pAD-C2-XhoI-R       | The same sequence as BEE2-pAD-C1-XhoI-R   |
| <i>ProGASA6</i> -GUS-a-F | GCGTCGACGGTAAAGGGTTTATCAAGTAAG            |
| <i>ProGASA6</i> -GUS-b-F | GCGTCGACAGTCGTTATGTTTGTGAAAGC             |
| <i>ProGASA6</i> -GUS-c-F | ATGTCGACTATTTGTTGGTTGGTCCCAATCAC          |
| <i>ProGASA6</i> -GUS-d-F | TCGTCGACTGCCTGTAGTCTTTTAATCACTG           |
| <i>ProGASA6</i> -GUS-R   | TACCCGGGCATGACTAGCTCTTGAGAGAGAG           |
| Probe -1                 | CAATTTTAAATCACAAATGCTATTTTATTGGACGACC     |
| Probe 2                  | GTCTCCCATGTGAGTGACATGGAGTTATG             |

---
